# Supplementary material for: Novel micropatterning technique reveals dependence of cell-substrate adhesion and migration of social amoebas on parental strain, development, and fluorescent markers
Source: PubMed Central journal article supplement (PMC7377449; doi:10.1371/journal.pone.0236171), 2020-07-23
Supplement: pone.0236171.s001.pdf [file pone.0236171.s001.pdf]

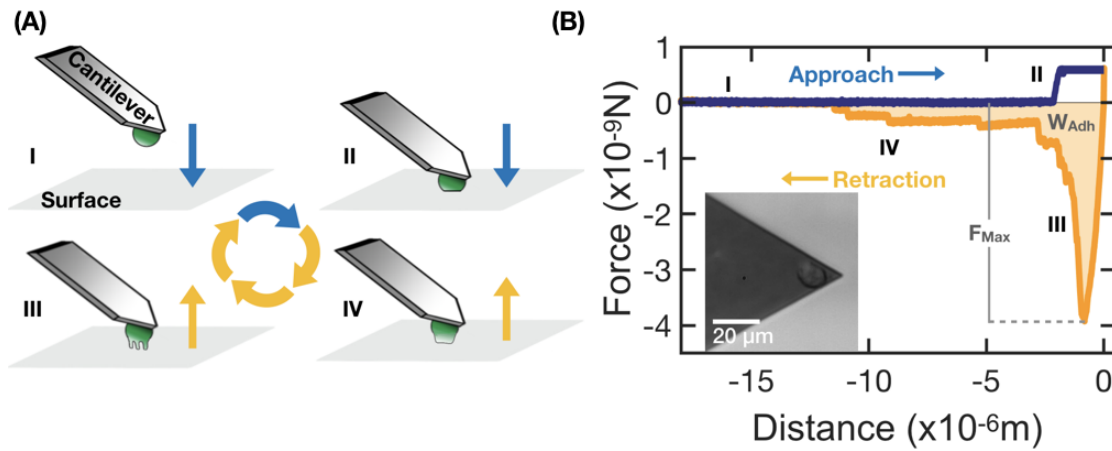

## Supporting information

**S1 Fig. Schematic setup for Single Cell Force Spectroscopy (SCFS).** SCFS involves repeated cycles of approach and retraction of a cantilever-attached *Dictyostelium* cell (inset, bottom, and scheme top left), resulting in force-distance (FD) curves (top right). These FD curves can be used to determine  $F_{max}$  and  $W_{adh}$ . For further details, see Methods.
