# Supplementary material for: Novel micropatterning technique reveals dependence of cell-substrate adhesion and migration of social amoebas on parental strain, development, and fluorescent markers
Source: PubMed Central journal article supplement (PMC7377449; doi:10.1371/journal.pone.0236171), 2020-07-23
Supplement: pone.0236171.s003.pdf [file pone.0236171.s003.pdf]

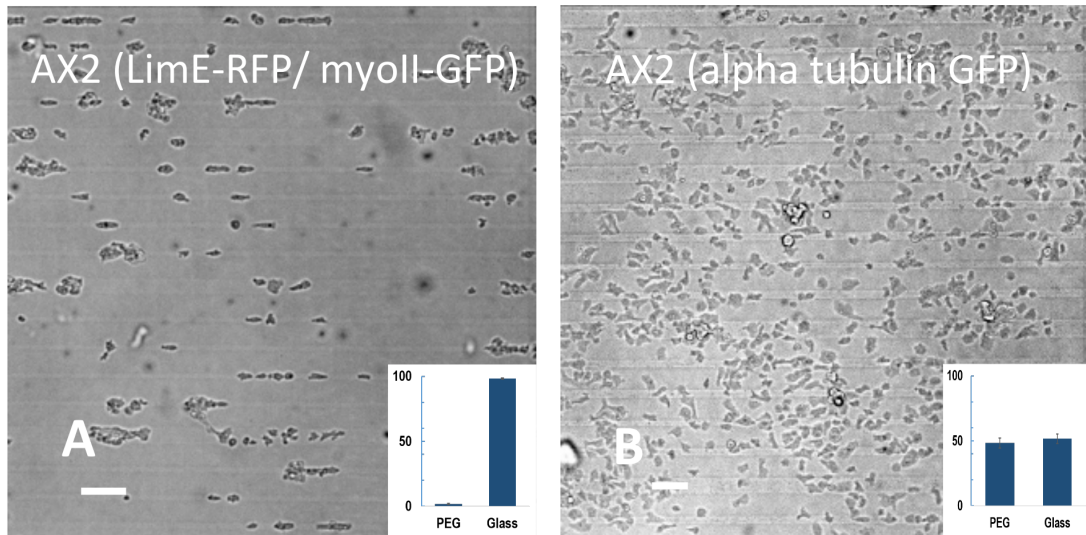

**S3 Fig.** Micrographs of developed AX2 cells expressing both LimE-RFP and myoII-GFP (A) and alpha-tubulin-GFP (B) on the micropatterned substrate taken 10 min after plating. Insets: relative coverage of cells on PEG-gel and glass stripes. (Scale bar: 50  $\mu\text{m}$ )
