# Supplementary material for: Novel micropatterning technique reveals dependence of cell-substrate adhesion and migration of social amoebas on parental strain, development, and fluorescent markers
Source: PubMed Central journal article supplement (PMC7377449; doi:10.1371/journal.pone.0236171), 2020-07-23
Supplement: pone.0236171.s004.pdf [file pone.0236171.s004.pdf]

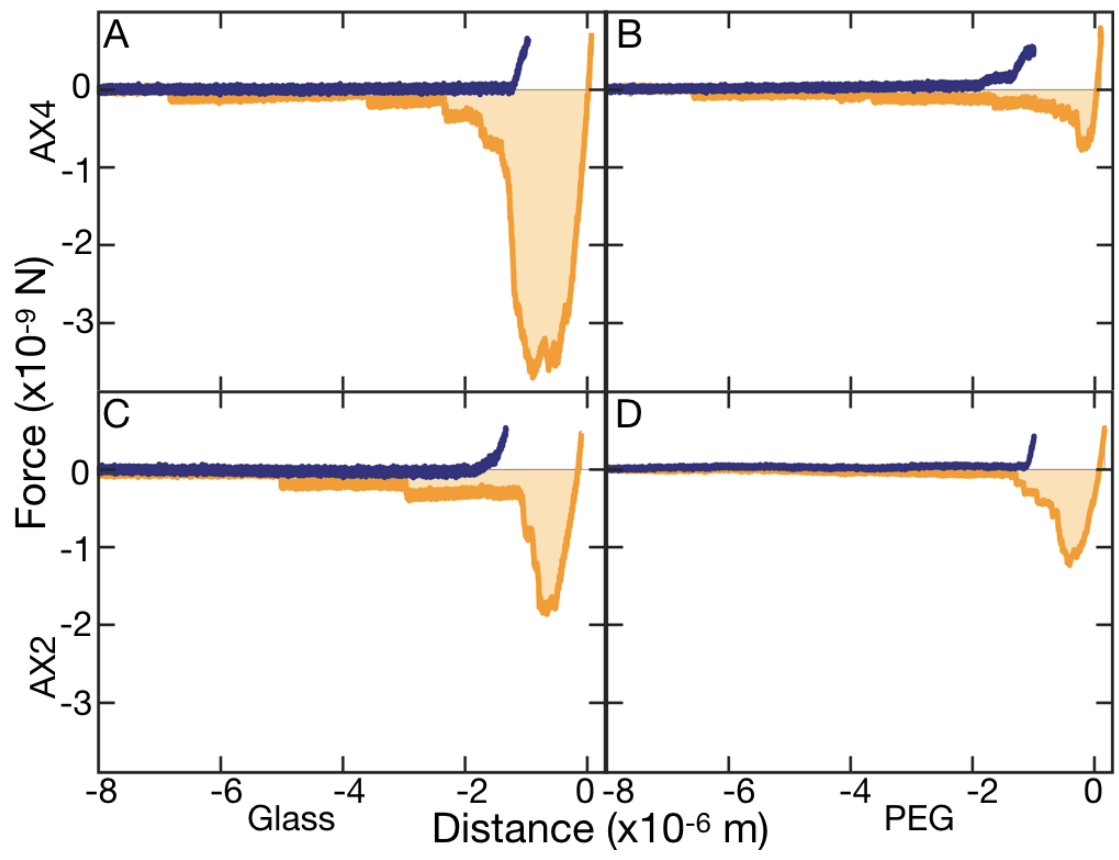

**S4 Fig.** Representative Force-Distance (FD) curves from SCFS experiments on AX2 and AX4 *Dictyostelium* cells on glass and PEG-gel surfaces.
