# Supplementary material for: Novel micropatterning technique reveals dependence of cell-substrate adhesion and migration of social amoebas on parental strain, development, and fluorescent markers
Source: PubMed Central journal article supplement (PMC7377449; doi:10.1371/journal.pone.0236171), 2020-07-23
Supplement: pone.0236171.s005.pdf [file pone.0236171.s005.pdf]

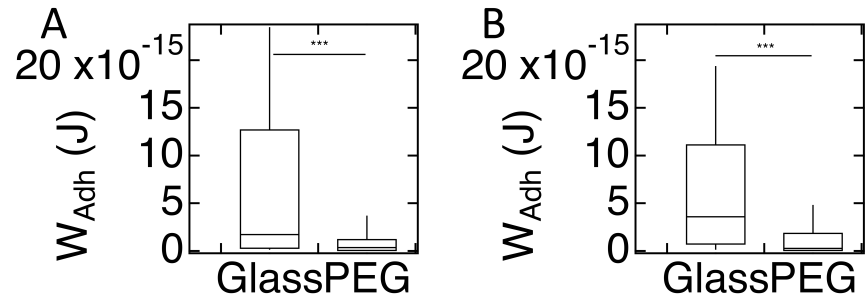

**S5 Fig.** Work of adhesion  $W_{adh}$  for developed WT AX2 (A) and AX4 cells (B). Median  $W_{adh}$  for PEG-gel is vs. glass  $3.6 \times 10^{-16}$  ( $6 \times 10^{-17}$ - $1.2 \times 10^{-15}$ )J vs.  $1.72 \times 10^{-15}$  ( $2.9 \times 10^{-16}$ - $1.27 \times 10^{-14}$ )J for AX2 and  $3.6 \times 10^{-15}$  ( $7 \times 10^{-16}$ - $1.12 \times 10^{-14}$ )J vs.  $2.8 \times 10^{-16}$  ( $6 \times 10^{-17}$ - $1.8 \times 10^{-15}$ )J for AX4 cells ( $p < 0.001$  for both).
