# Supplementary material for: Novel micropatterning technique reveals dependence of cell-substrate adhesion and migration of social amoebas on parental strain, development, and fluorescent markers
Source: PubMed Central journal article supplement (PMC7377449; doi:10.1371/journal.pone.0236171), 2020-07-23
Supplement: pone.0236171.s006.pdf [file pone.0236171.s006.pdf]

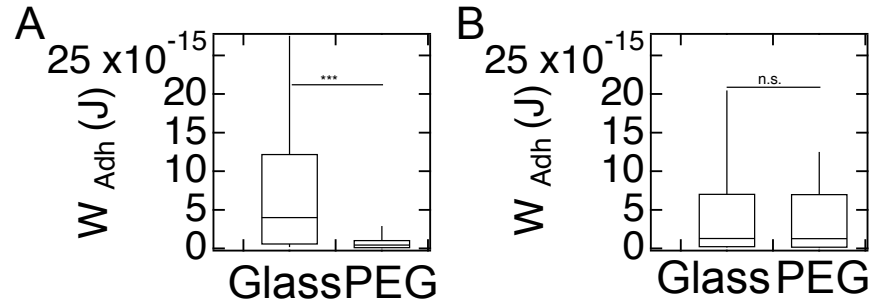

**S6 Fig.**  $W_{adh}$  on glass and PEG-gel surfaces for vegetative AX2 (A;  $4.4 \times 10^{-16}$  ( $1.0 \times 10^{-16}$ - $1.0 \times 10^{-15}$ )J vs.  $4.0 \times 10^{-15}$  ( $5.8 \times 10^{-16}$ - $1.22 \times 10^{-14}$ )J and for vegetative AX4 cells (B;  $1.3 \times 10^{-15}$  ( $2 \times 10^{-16}$ - $7.0 \times 10^{-15}$ )J vs.  $1.3 \times 10^{-15}$  ( $2 \times 10^{-16}$ - $7.0 \times 10^{-15}$ )J).
