# Supplementary material for: Novel micropatterning technique reveals dependence of cell-substrate adhesion and migration of social amoebas on parental strain, development, and fluorescent markers
Source: PubMed Central journal article supplement (PMC7377449; doi:10.1371/journal.pone.0236171), 2020-07-23
Supplement: pone.0236171.s007.pdf [file pone.0236171.s007.pdf]

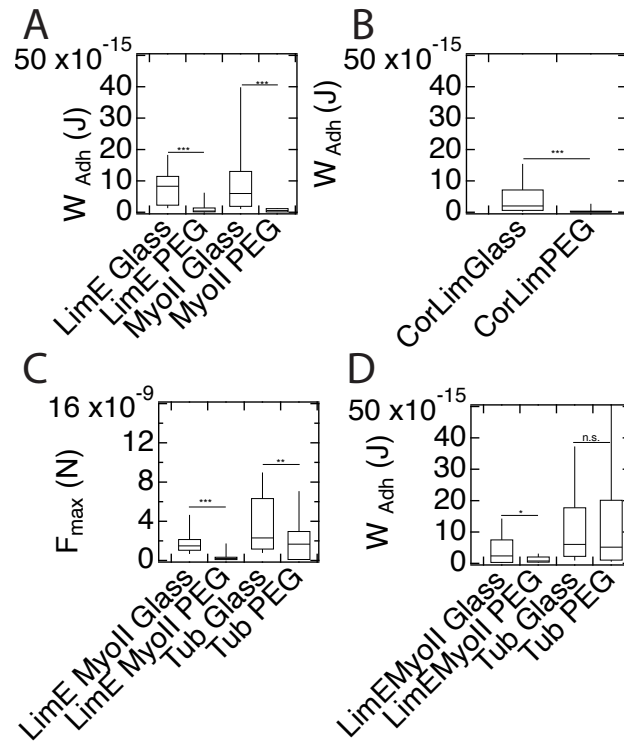

**S7 Fig.** Additional SCFS data:  $W_{adh}$  for developed AX2 cells expressing LimE-GFP or myoII-GFP (A) and for developed AX4 cells expressing LimE-GFP/corA-RFP (B).  $F_{max}$  for developed AX2 cells expressing both LimE-RFP and myoII-GFP, and alpha-tubulin-GFP (C) and the corresponding  $W_{adh}$  (D).
