# Supplementary material for: Novel micropatterning technique reveals dependence of cell-substrate adhesion and migration of social amoebas on parental strain, development, and fluorescent markers
Source: PubMed Central journal article supplement (PMC7377449; doi:10.1371/journal.pone.0236171), 2020-07-23
Supplement: pone.0236171.s008.pdf [file pone.0236171.s008.pdf]

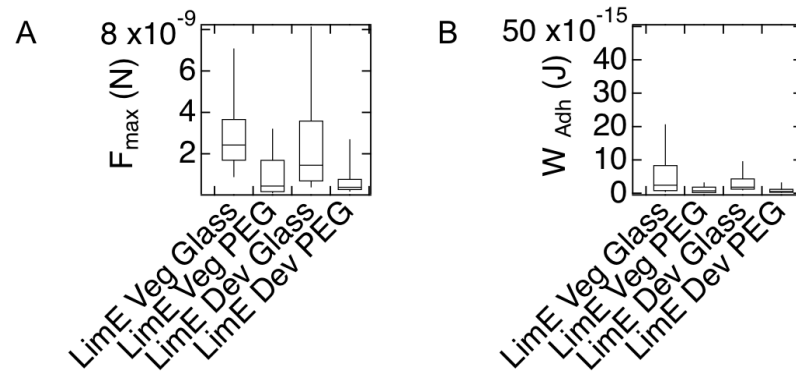

**S8 Fig.**  $F_{max}$  (A) and  $W_{adh}$  (B) for vegetative and developed fluorescently labeled AX4 cells on glass and PEG.
