# Supplementary material for: Novel micropatterning technique reveals dependence of cell-substrate adhesion and migration of social amoebas on parental strain, development, and fluorescent markers
Source: PubMed Central journal article supplement (PMC7377449; doi:10.1371/journal.pone.0236171), 2020-07-23
Supplement: pone.0236171.s016.pdf [file pone.0236171.s016.pdf]

**S1 Table. Statistics for SCFS measurement with WT developed cells.** Reported here, and in other tables, are the number of separate experiments ( $N_{\text{days}}$ ), total number of cells ( $N_{\text{cells}}$ ), and the number of FD curves ( $N_{\text{curves}}$ ).

|                     | AX2/Glass | AX2/PEG | AX4/Glass | AX4/PEG |
|---------------------|-----------|---------|-----------|---------|
| $N_{\text{days}}$   | 3         | 4       | 3         | 4       |
| $N_{\text{cells}}$  | 27        | 18      | 26        | 23      |
| $N_{\text{curves}}$ | 102       | 113     | 142       | 98      |
