# Supplementary material for: Novel micropatterning technique reveals dependence of cell-substrate adhesion and migration of social amoebas on parental strain, development, and fluorescent markers
Source: PubMed Central journal article supplement (PMC7377449; doi:10.1371/journal.pone.0236171), 2020-07-23
Supplement: pone.0236171.s018.pdf [file pone.0236171.s018.pdf]

**S3 Table.** p-values for  $W_{adh}$ .

|           | AX2/Glass | AX2/PEG | AX4/Glass | AX4/PEG |
|-----------|-----------|---------|-----------|---------|
| AX2/Glass | -         | < 0.001 | 0.059     | < 0.001 |
| AX2/PEG   | -         | -       | < 0.001   | 0.402   |
| AX4/Glass | -         | -       | -         | < 0.001 |
