# Supplementary material for: Novel micropatterning technique reveals dependence of cell-substrate adhesion and migration of social amoebas on parental strain, development, and fluorescent markers
Source: PubMed Central journal article supplement (PMC7377449; doi:10.1371/journal.pone.0236171), 2020-07-23
Supplement: pone.0236171.s019.pdf [file pone.0236171.s019.pdf]

**S4 Table. Statistics for SCFS measurements using WT vegetative cells.**

|                     | AX2/Glass | AX2/PEG | AX4/Glass | AX4/PEG |
|---------------------|-----------|---------|-----------|---------|
| N <sub>days</sub>   | 4         | 3       | 3         | 3       |
| N <sub>cells</sub>  | 20        | 24      | 21        | 20      |
| N <sub>curves</sub> | 108       | 116     | 90        | 97      |
