# Supplementary material for: Novel micropatterning technique reveals dependence of cell-substrate adhesion and migration of social amoebas on parental strain, development, and fluorescent markers
Source: PubMed Central journal article supplement (PMC7377449; doi:10.1371/journal.pone.0236171), 2020-07-23
Supplement: pone.0236171.s023.pdf [file pone.0236171.s023.pdf]

**S8 Table.** p-values for  $F_{max}$  (developed AX2 cells).

|            | LimE<br>Glass | Myo<br>Glass | LimE<br>PEG | Myo<br>PEG |
|------------|---------------|--------------|-------------|------------|
| LimE/Glass | -             | 0.38         | 0.002       | < 0.001    |
| Myo/Glass  | -             | -            | < 0.001     | < 0.001    |
| LimE/PEG   | -             | -            | -           | 0.007      |
