# Supplementary material for: Novel micropatterning technique reveals dependence of cell-substrate adhesion and migration of social amoebas on parental strain, development, and fluorescent markers
Source: PubMed Central journal article supplement (PMC7377449; doi:10.1371/journal.pone.0236171), 2020-07-23
Supplement: pone.0236171.s025.pdf [file pone.0236171.s025.pdf]

**S10 Table. Statistics for SCFS experiments using vegetative, labeled cells.**

|                     | AX2 LimE<br>Glass | AX2 Myo<br>Glass | AX4 LimE-corA<br>Glass | AX2 LimE<br>PEG | AX2 Myo<br>PEG | AX4 LimE-corA<br>PEG |
|---------------------|-------------------|------------------|------------------------|-----------------|----------------|----------------------|
| $N_{\text{cells}}$  | 5                 | 9                | 12                     | 5               | 6              | 16                   |
| $N_{\text{curves}}$ | 19                | 42               | 58                     | 11              | 23             | 63                   |
